# Addition and correction: the NF- $\kappa$ B-like DNA binding activity observed in *Dictyostelium* nuclear extracts is due to the GBF transcription factor

François Traincard<sup>1</sup>, Eleonora Ponte<sup>1</sup>, Jason Pun<sup>2</sup>, Barrie Coukell<sup>2</sup> and Michel Veron<sup>1</sup>

<sup>1</sup>Unité de Régulation enzymatique des Activités cellulaires, CNRS FRE 2364, Institut Pasteur, 25 rue du Dr Roux, 75724 Paris Cedex 15, France

<sup>2</sup>York University, 4700 Keele Street, Toronto, Ontario, M3J 1P3, Canada.

Author for correspondence (e-mail: mveron@pasteur.fr)

Accepted 6 July 2001

Journal of Cell Science 114, 3767-3769 (2001) © The Company of Biologists Ltd

## SUMMARY

We have previously reported that a NF- $\kappa$ B transduction pathway was likely to be present in the cellular slime mold *Dictyostelium discoideum*. This conclusion was based on several observations, including the detection of developmentally regulated DNA binding proteins in *Dictyostelium* nuclear extracts that bound to bona fide  $\kappa$ B sequences. We have now performed additional experiments which demonstrate that the protein responsible for this NF- $\kappa$ B-like DNA binding activity is the *Dictyostelium* GBF (G box regulatory element binding factor) transcription

factor. This result, along with the fact that no sequence with significant similarity to components of the mammalian NF- $\kappa$ B pathway can be found in *Dictyostelium* genome, now almost entirely sequenced, led us to reconsider our previous conclusion on the occurrence of a NF- $\kappa$ B signal transduction pathway in *Dictyostelium*.

Key words: *Dictyostelium discoideum*, GBF transcription factor, NF- $\kappa$ B

## INTRODUCTION

The NF- $\kappa$ B transduction pathway initially found in mammalian cells (Sen and Baltimore, 1986), is involved in a variety of responses to environment changes (Bauerle and Henkel, 1994). It is composed of several elements including regulatory kinases (IKK1 and IKK2), so called 'inhibitors' (I $\kappa$ B $\alpha$ , I $\kappa$ B $\beta$  and I $\kappa$ B $\epsilon$ ) and transcription factors (p65, p50, p52, cRel, RelB). Homologous systems have now been described in *Drosophila* (Steward, 1987) and *Xenopus* (Kao and Hopwood, 1991). By contrast, no NF- $\kappa$ B pathway was found in *C. elegans* (Ruvkun and Hobert, 1998) or yeast (Epinat et al., 1997). In a recent report, we have described results suggesting the presence of an NF- $\kappa$ B transduction pathway in the cellular slime mold *Dictyostelium discoideum* (Traincard et al., 1999). Our evidence was based on several approaches. Using antibodies raised against several mammalian NF- $\kappa$ B proteins (p65, p50, p52, I $\kappa$ B $\beta$ , IKK1 and IKK2) we detected homologous proteins in *Dictyostelium* extracts by western blots and we showed that the *Dictyostelium* p65 and p50-like proteins were translocated into the nucleus upon development. In addition, gel retardation experiments performed with *Dictyostelium* nuclear extracts indicated the presence of NF- $\kappa$ B-like DNA binding proteins. For this, we used GCR, an oligonucleotide (GC-rich) derived from the promoter of *cbpA*, a developmentally regulated *Dictyostelium* gene that carries an NF- $\kappa$ B-like DNA sequence (Fig. 1) (Coukell et al., 1995). The demonstration that GCR as well as mammalian bona fide NF- $\kappa$ B DNA sequences such as I $\kappa$ B $\kappa$  (Fig. 1) could bind specifically to developmentally regulated *Dictyostelium* nuclear proteins was considered powerful evidence for the presence of NF- $\kappa$ B proteins in *Dictyostelium* (Traincard et al., 1999).

However, it later occurred to us that all of the oligonucleotides used in our study contained a G-rich region with the potential to bind to a well characterized developmentally regulated *Dictyostelium* transcription factor called GBF (for G box regulatory element binding factor) (Hjorth et al., 1990; Schnitzler et al., 1994). GBF binds to DNA sequences containing two copies of a G/T interspersed sequence (Fig. 1, GBF cons.), whose spacing and orientation is flexible (Hjorth et al., 1990; Schnitzler et al., 1994). As shown in Fig. 1, there is at least one copy of the GBF-like sequences present in both GCR and in the other oligonucleotides used in the gel shift experiments described previously (Traincard et al., 1999). This observation raised the possibility that the gel retardation observed was due to GBF itself rather than to NF- $\kappa$ B like proteins. Here we show that this is indeed the case, leading to a re-examination of the previous conclusion on the occurrence of a NF- $\kappa$ B signal transduction pathway in *Dictyostelium discoideum*.

## RESULTS AND DISCUSSION

In the new gel shift experiments reported here we used several new oligonucleotides (Fig. 1). Car3 is an oligonucleotide derived from the GBF activated promoter of the *Dictyostelium car3* gene with a GBF binding site that contains a GT interspersed region (Gollop and Kimmel, 1997) instead of the poly-G region found in NF- $\kappa$ B target sequences. Its sequence strongly differs from that of the GCR oligonucleotide used in our previous experiments.

We first established that the Car3 oligonucleotide was unable



We thank C. Laurent-Winter (Laboratoire de Chimie Structurale des Macromolécules, Institut Pasteur) for performing bi-dimensionnal electrophoresis and J. d'Alayer (Laboratoire de Microséquençage des Protéines, Institut Pasteur) for peptide sequencing. We also thank G. Courtois (Unité de Biologie Moléculaire de l'Expression Génétique, Institut Pasteur), for the gift of the p50 protein. This work was supported in part by a grant from Association de la Recherche contre le Cancer to M.V. and by a fellowship from the Fondation de la Recherche Médicale to E.P.

## REFERENCES

- Bauerle, P. A. and Henkel, T.** (1994). Function and activation of NF- $\kappa$ B in the immune system. *Annu. Rev. Immunol.* **12**, 141-179.
- Coukell, B., Moniakis, J. and Grinberg, A.** (1995). Cloning and expression in *Escherichia coli* of a cDNA encoding a developmentally regulated Ca<sup>2+</sup>-binding protein from *Dictyostelium discoideum*. *FEBS Lett.* **362**, 342-346.
- Epinat, J.-C., Whiteside, S., Rice, N. and Israel, A.** (1997). Reconstitution of the NF- $\kappa$ B system in *Saccharomyces cerevisiae* for isolation of effectors by phenotype modulation. *Yeast* **13**, 599-612.
- Gollop, R. and Kimmel, A. R.** (1997). Control of cell-type specific gene expression in *Dictyostelium* by the general transcription factor GBF. *Development* **124**, 3395-3405.
- Hjorth, A. L., Pears, C., Williams, J. G. and Firtel, R. A.** (1990). A developmentally regulated trans-acting factor recognizes dissimilar G/C-rich element controlling a class of cAMP-inducible *Dictyostelium* genes. *Genes Dev.* **4**, 419-432.
- Kao, K. R. and Hopwood, N. D.** (1991). Expression of a mRNA related to c-rel and dorsal in early *Xenopus laevis* embryos. *Proc. Natl. Acad. Sci. USA* **88**, 2697-2701.
- Ruvkun, G. and Hobert, O.** (1998). The taxonomy of developmental control in *Caenorhabditis elegans*. *Science* **282**, 22033-22041
- Schnitzler, G., Fischer, W. and Firtel, R.** (1994). Cloning and characterization of the G-box binding factor, an essential component of the developmental switch between early and late development in *Dictyostelium*. *Cell* **81**, 737-745.
- Sen, R., and Baltimore, D.** (1986). Multiple nuclear factors interact with the immunoglobulin enhancer sequences. *Cell* **46**, 705-716.
- Steward, R.** (1987). *Dorsal*, an embryonic polarity gene in *Drosophila* is homologous to the vertebrate proto-oncogene, c-rel. *Science* **238**, 692-694.
- Traincard, F., Ponte, E., Pun, J., Coukell, B. and Véron, M.** (1999). Evidence for the presence of an NF- $\kappa$ B signal transduction system in *Dictyostelium discoideum*. *J. Cell Sci.* **112**, 3529-3535.
